# Supplementary material for: Serial Lift-Out: sampling the molecular anatomy of whole organisms
Source: PubMed Central journal article supplement (PMC11399102; doi:10.1038/s41592-023-02113-5), 2023-12-18
Supplement: 41592_2023_2113_MOESM2_ESM.pdf [file 41592_2023_2113_MOESM2_ESM.pdf]

## Reporting Summary

Nature Portfolio wishes to improve the reproducibility of the work that we publish. This form provides structure for consistency and transparency in reporting. For further information on Nature Portfolio policies, see our [Editorial Policies](#) and the [Editorial Policy Checklist](#).

### Statistics

For all statistical analyses, confirm that the following items are present in the figure legend, table legend, main text, or Methods section.

n/a Confirmed

- The exact sample size ( $n$ ) for each experimental group/condition, given as a discrete number and unit of measurement
- A statement on whether measurements were taken from distinct samples or whether the same sample was measured repeatedly
- The statistical test(s) used AND whether they are one- or two-sided  
*Only common tests should be described solely by name; describe more complex techniques in the Methods section.*
- A description of all covariates tested
- A description of any assumptions or corrections, such as tests of normality and adjustment for multiple comparisons
- A full description of the statistical parameters including central tendency (e.g. means) or other basic estimates (e.g. regression coefficient) AND variation (e.g. standard deviation) or associated estimates of uncertainty (e.g. confidence intervals)
- For null hypothesis testing, the test statistic (e.g.  $F$ ,  $t$ ,  $r$ ) with confidence intervals, effect sizes, degrees of freedom and  $P$  value noted  
*Give  $P$  values as exact values whenever suitable.*
- For Bayesian analysis, information on the choice of priors and Markov chain Monte Carlo settings
- For hierarchical and complex designs, identification of the appropriate level for tests and full reporting of outcomes
- Estimates of effect sizes (e.g. Cohen's  $d$ , Pearson's  $r$ ), indicating how they were calculated

*Our web collection on [statistics for biologists](#) contains articles on many of the points above.*

### Software and code

Policy information about [availability of computer code](#)

Data collection

FIB/SEM data: XT v 20.1.1  
Confocal cryo fluorescence data: LAS X 3.5.5.19976  
Wide field cryo fluorescence data: Odemis 3.2.1  
Tilt series acquisition: Tomo5 5.12.0

Data analysis

Overview processing: ImageJ 2.9.0 + TrackEM plugin  
Fluorescence data: MAPS 3.14  
Tilt series/tomograms: IMOD 4.12.32, AreTomo 1.3.3, STOPGAP 0.7, TOMOMAN 0.7, Relion 4.0, Relion 3.0, Relion 3.1, WARP/M 1.0.9 ,  
ChimeraX 1.3. MotionCor2 1.4.7, CTFIND4 4.14

For manuscripts utilizing custom algorithms or software that are central to the research but not yet described in published literature, software must be made available to editors and reviewers. We strongly encourage code deposition in a community repository (e.g. GitHub). See the Nature Portfolio [guidelines for submitting code & software](#) for further information.

## Data

Policy information about [availability of data](#)

All manuscripts must include a [data availability statement](#). This statement should provide the following information, where applicable:

- Accession codes, unique identifiers, or web links for publicly available datasets
- A description of any restrictions on data availability
- For clinical datasets or third party data, please ensure that the statement adheres to our [policy](#)

Tomograms have been deposited in the Electron Microscopy Data Bank (EMDB) under accession codes: EMD-17246, EMD-17247, EMD-17248, EMD-18186  
Subtomogram averages have been uploaded under accession numbers: EMD-17241, EMD-17242, EMD-17243, EMD-17244, EMD-17245, EMD-18187, and will be released upon publication.

## Human research participants

Policy information about [studies involving human research participants and Sex and Gender in Research](#).

|                             |     |
|-----------------------------|-----|
| Reporting on sex and gender | N/A |
| Population characteristics  | N/A |
| Recruitment                 | N/A |
| Ethics oversight            | N/A |

Note that full information on the approval of the study protocol must also be provided in the manuscript.

## Field-specific reporting

Please select the one below that is the best fit for your research. If you are not sure, read the appropriate sections before making your selection.

Life sciences  Behavioural & social sciences  Ecological, evolutionary & environmental sciences

For a reference copy of the document with all sections, see [nature.com/documents/nr-reporting-summary-flat.pdf](https://nature.com/documents/nr-reporting-summary-flat.pdf)

## Life sciences study design

All studies must disclose on these points even when the disclosure is negative.

|                 |                                                                                                                                                                                                                                                                                                                                                                                                                                                                                                                                                                                                                                                                                             |
|-----------------|---------------------------------------------------------------------------------------------------------------------------------------------------------------------------------------------------------------------------------------------------------------------------------------------------------------------------------------------------------------------------------------------------------------------------------------------------------------------------------------------------------------------------------------------------------------------------------------------------------------------------------------------------------------------------------------------|
| Sample size     | Sample sizes were not determined through statistical methods. For the three separate <i>C. elegans</i> Serial Lift-Out and single on-grid experiments, four individuals from separate strains (twice AM140, both from one 'waffle' grid, twice NK2476 from one 'waffle' grid) were used. One egg chamber of <i>Drosophila melanogaster</i> (GFP-Nup358 endogenously tagged) was used for the Serial Lift-Out experiment from high-pressure freezing planchettes. Descriptive statistics on tomogram thicknesses is based on either all tomograms (n=56 for Experiment 1, n=90 for Experiment 3) or a randomized subset (n=132 for Experiment 2) of reconstructed tomograms for experiment . |
| Data exclusions | Tomograms for subtomogram averaging but not for tomogram thickness measurement were excluded based on on poor reconstruction quality and excessive thickness. Particles were excluded based on classification during subtomogram averaging when not contributing to an improvement of the GSFSC criterion.                                                                                                                                                                                                                                                                                                                                                                                  |
| Replication     | Serial Lift-Out has been replicated several tens of times on different sample types by the authors and other members of the Baumeister and Briggs departments at the MPI of Biochemistry (MPI of Biochemistry, Martinsried, Germany). The method was adopted in other labs including the labs of Stefan Raunser (MPI for Molecular Physiology, Dortmund, Germany), Philipp Erdmann (Human Technopole, Milan, Italy), and Julia Mahamid (EMBL Heidelberg, Germany).                                                                                                                                                                                                                          |
| Randomization   | Individuals of <i>C. elegans</i> were selected solely based on the criterion of accessibility for lift-out, mainly influenced by body curvature, lateral position and orientation on the grid. Tomograms for subtomogram averaging were only selected based on lamella thickness and otherwise randomly from the whole dataset.                                                                                                                                                                                                                                                                                                                                                             |
| Blinding        | Data collection and analysis were not blinded.                                                                                                                                                                                                                                                                                                                                                                                                                                                                                                                                                                                                                                              |

## Reporting for specific materials, systems and methods

We require information from authors about some types of materials, experimental systems and methods used in many studies. Here, indicate whether each material, system or method listed is relevant to your study. If you are not sure if a list item applies to your research, read the appropriate section before selecting a response.

### Materials & experimental systems

### Methods

- | n/a                                 | Involvement                                                     |
|-------------------------------------|-----------------------------------------------------------------|
| <input checked="" type="checkbox"/> | <input type="checkbox"/> Antibodies                             |
| <input checked="" type="checkbox"/> | <input type="checkbox"/> Eukaryotic cell lines                  |
| <input checked="" type="checkbox"/> | <input type="checkbox"/> Palaeontology and archaeology          |
| <input type="checkbox"/>            | <input checked="" type="checkbox"/> Animals and other organisms |
| <input checked="" type="checkbox"/> | <input type="checkbox"/> Clinical data                          |
| <input checked="" type="checkbox"/> | <input type="checkbox"/> Dual use research of concern           |

- | n/a                                 | Involvement                                     |
|-------------------------------------|-------------------------------------------------|
| <input checked="" type="checkbox"/> | <input type="checkbox"/> ChIP-seq               |
| <input checked="" type="checkbox"/> | <input type="checkbox"/> Flow cytometry         |
| <input checked="" type="checkbox"/> | <input type="checkbox"/> MRI-based neuroimaging |

## Animals and other research organisms

Policy information about [studies involving animals](#); [ARRIVE guidelines](#) recommended for reporting animal research, and [Sex and Gender in Research](#)

Laboratory animals

Caenorhabditis elegans, Drosophila melanogaster

Wild animals

No wild animals were used.

Reporting on sex

Hermaphrodites (C. elegans), female (D. melanogaster)

Field-collected samples

No field samples were used.

Ethics oversight

C. elegans and D. melanogaster do not require ethic approval for use in experiments.

Note that full information on the approval of the study protocol must also be provided in the manuscript.
